# Supplementary material
Source: publisher figshare collection journal article supplement (https://adisjournals.figshare.com/articles/dataset/_/12631385)
Supplement: Supplementary file 1 [file 1]

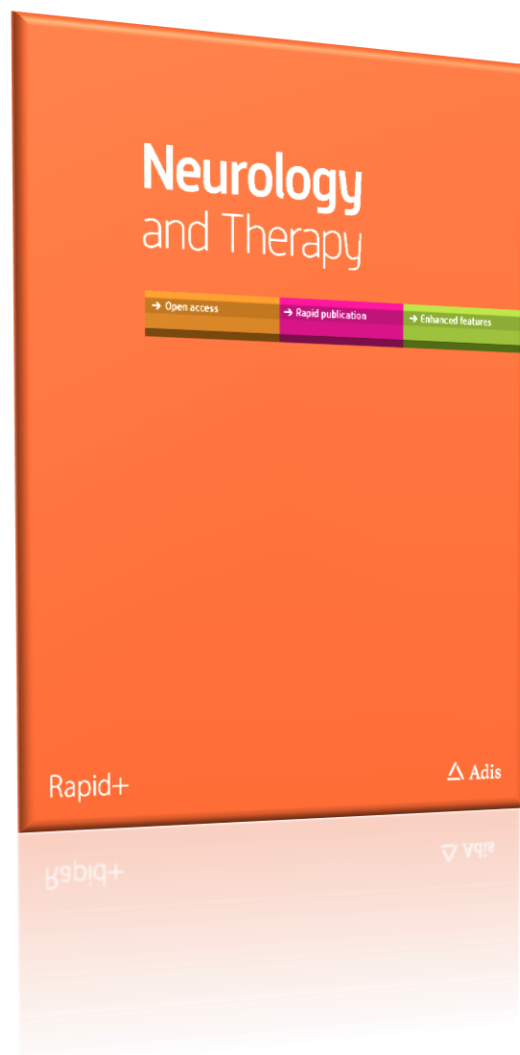

## A Call to Action: The Role of Healthcare Providers in Reducing the Burden Associated With Neurogenic Orthostatic Hypotension

Jessie Sellers Gibson, PhD, RN, AGPCNP-BC,<sup>1</sup>  
Christine B. Hunter, RN, BSN,<sup>2</sup> L. Arthur Hewitt, PhD<sup>3</sup>

<sup>1</sup>Vanderbilt University Medical Center, Nashville, TN; <sup>2</sup>Parkinson's Disease Center and Movement Disorders Center, Baylor College of Medicine, Houston, TX; <sup>3</sup>Medical Affairs, Lundbeck, Deerfield, IL

This slide deck represents the opinions of the authors. For a full list of declarations, including funding and author disclosure statements, please see the full text online.

## Abbreviations

- BP=blood pressure
- DBP=diastolic blood pressure
- HCP=healthcare provider
- HR=heart rate
- nOH=neurogenic orthostatic hypotension
- OH=orthostatic hypotension
- SBP=systolic blood pressure

## What is neurogenic orthostatic hypotension?

- Orthostatic hypotension (OH) is a sustained blood pressure drop that occurs when standing up
- When OH occurs because of a neurologic condition that is associated with autonomic nervous system dysfunction (eg, Parkinson disease or other synucleinopathies), it is called neurogenic orthostatic hypotension or nOH

### Moving to standing

- Blood volume shifts to the abdomen and legs
- Less blood circulation to the heart and brain

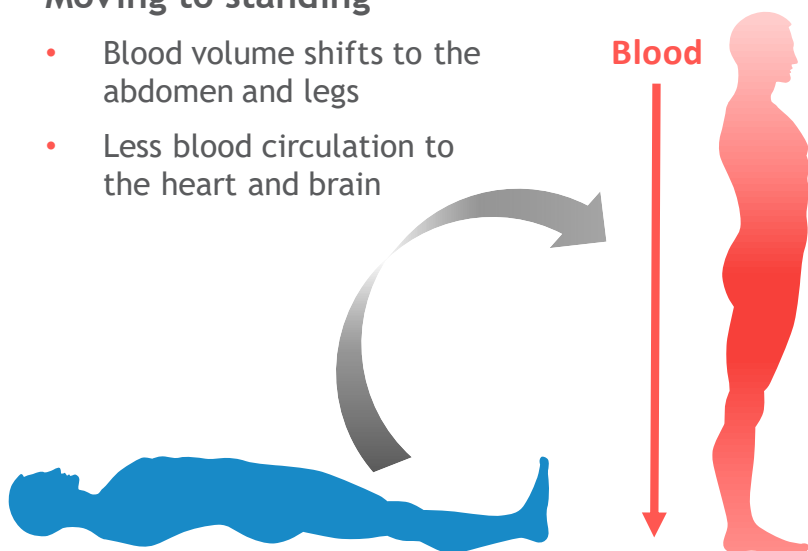

### Persons with certain neurologic conditions

- Have damage in their autonomic nervous system
- Their bodies cannot signal for enough blood to pump back to the heart and brain

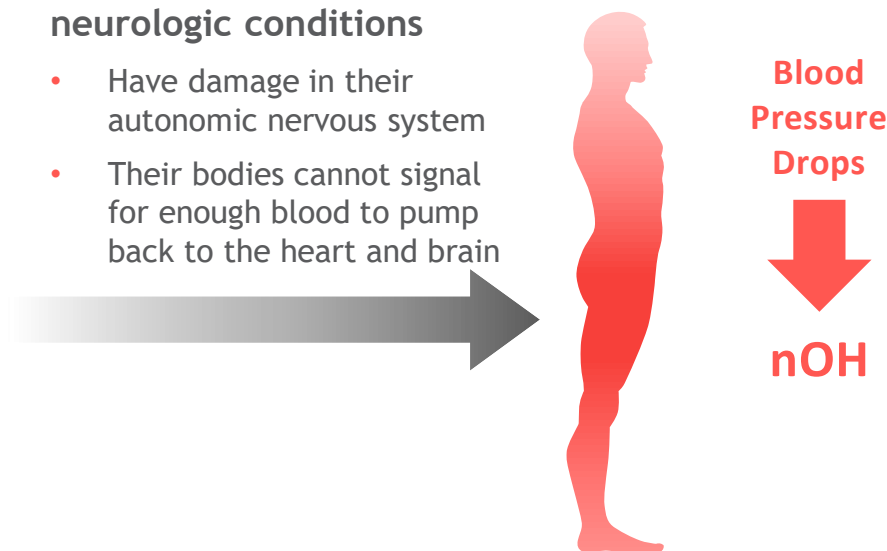

## What are the symptoms of nOH?

- nOH causes a variety of symptoms that occur upon standing

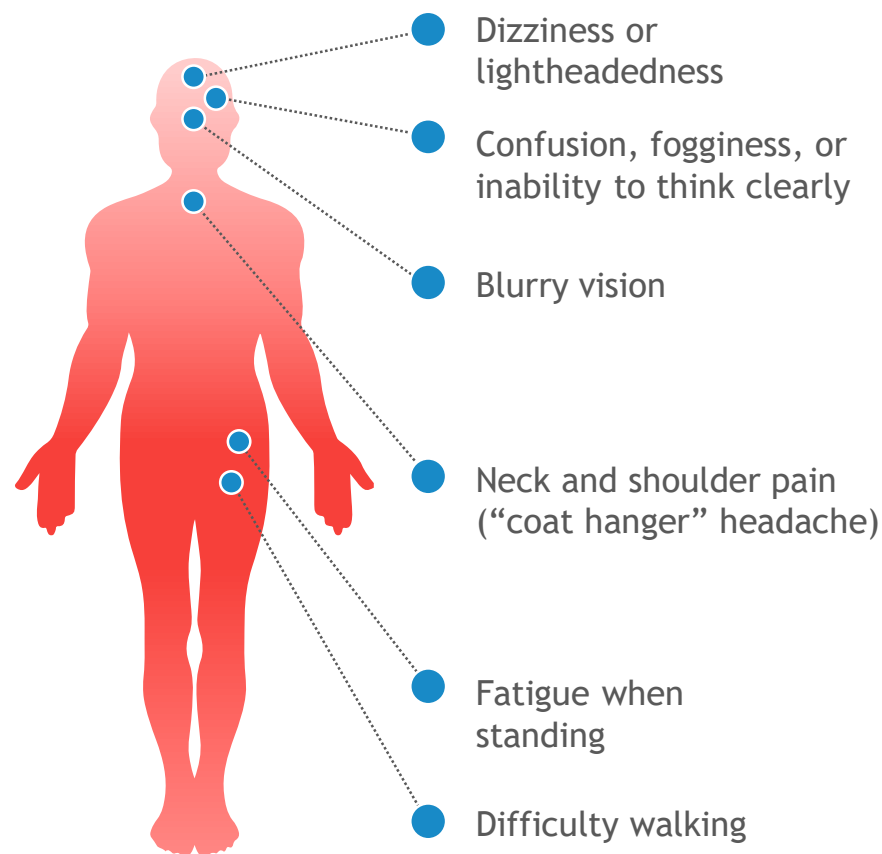

- Patients may not know that nOH symptoms are from a condition that is separate from the underlying neurodegenerative disease

### Patient Perspective

*"Initially, I did not realize that I had nOH."*

*"I attributed all of [the symptoms] to PD [Parkinson disease]"*

*"It became evident that the nOH was causing me to feel more 'stuck' or 'frozen' than I would otherwise feel as a Parkinson's patient."*

nOH=neurogenic orthostatic hypotension

## How can nOH symptoms affect patients?

- nOH symptoms have a substantial effect on a patient's ability to perform daily activities and reduce quality of life<sup>1</sup>

Reduced Ability to Perform Daily Activities\*

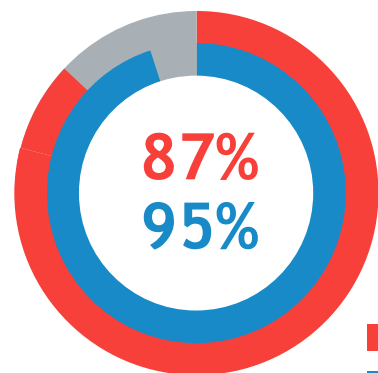

■ Patients  
■ Caregivers

Reduced Quality of Life\*

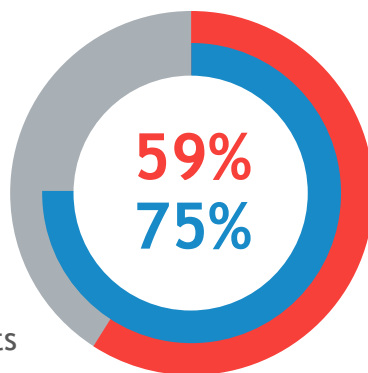

### Patient Perspective

*"[Difficulty with] movement, putting my clothes on, getting out of bed or a chair, things that it was embarrassing in public to have happen - it affects your mental outlook."*

*"I would try to do projects around the house...and not complete it. I didn't have the energy."*

*"It was difficult to plan things for the evening after work...[I had] a desire to just go to bed."*

*"This leads to depression, loss of sleep, anxiety, and overall malaise."*

nOH=neurogenic orthostatic hypotension

\*Percentages represent respondents agreeing with the statement in a survey of patients and caregivers. Patient and caregiver respondents were not paired

1. Claassen DO, et al. *BMC Neurol.* 2018;18(1):125

## What challenges do patients have when discussing nOH with their healthcare providers?

- Patients may not share information about the nOH symptoms they experience with their healthcare providers (HCPs)<sup>1</sup>

Patients Do Not Discuss nOH Symptoms With HCPs Unless Severe\*

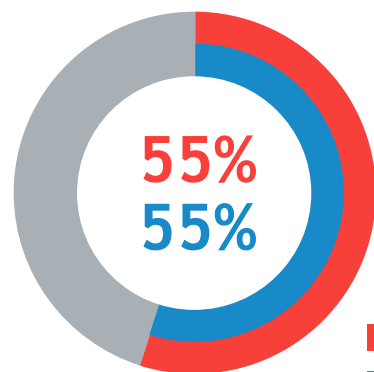

Patients Are Uncomfortable Talking With HCPs About Impact of nOH Symptoms\*

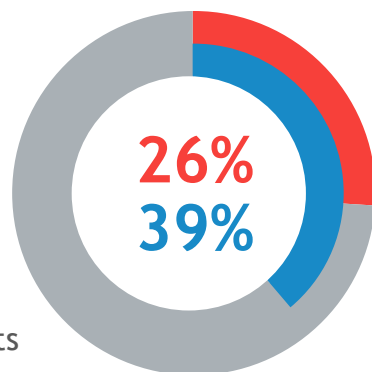

■ Patients  
■ Caregivers

### Patient Perspective

*"There is so much information that [my HCPs] had, and you just get overwhelmed... and you don't... connect the dots that [blood pressure] may be an issue."*

*"As a nonmedical person, I don't know what factors matter and what to tell [my HCPs]. Or I might get confused as to why something is happening."*

*"So I just am very careful not to put any judgment on what I'm feeling when I'm telling them my symptoms. [My HCPs] are very good at asking the same question several different ways to clarify the answers."*

HCP=healthcare providers; nOH=neurogenic orthostatic hypotension

\*Percentages represent respondents agreeing with the statement in a survey of patients and caregivers. Patient and caregiver respondents were not paired

1. Claassen DO, et al. *BMC Neurol.* 2018;18(1):125

## What are patient experiences with nOH diagnosis and management?

- Patients can find getting a diagnosis of nOH frustrating, but they also report improved management of their symptoms after diagnosis<sup>1</sup>

Patients Finding the Path to nOH Diagnosis Very Frustrating\*

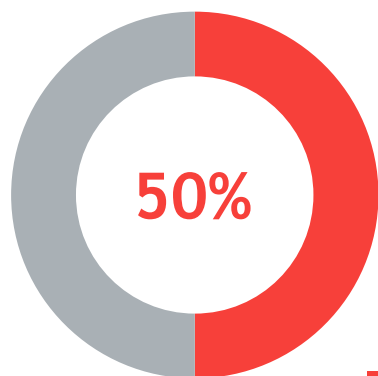

■ Patients

Patients Reporting Improved Management of nOH Symptoms After Formal Diagnosis\*

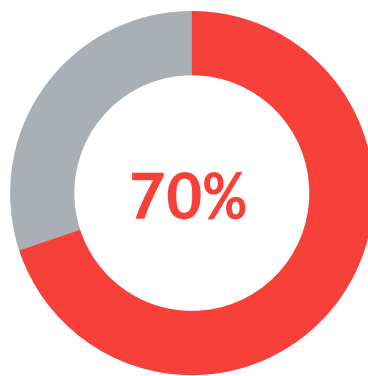

### Patient Perspective

*“Once we were able to recognize that nOH was an issue [and treatment was initiated],... within a few days, I began to perk up, had a bounce in my step, felt overall motivated to exercise and take on projects, slept better, and felt very encouraged....You begin to have hope...”*

*“The improvement in energy levels and the decline of depression and anxiety were great... I felt like my cognitive skills were returning to pre-Parkinson’s level.”*

### Caregiver Perspective

*“I notice a huge difference... his attitude, the way he’s getting up and down; he’s been much better. I think he was beginning to think he couldn’t do stuff. Once [his HCPs] figured it out, I think his attitude changed.”*

HCP=healthcare provider; nOH=neurogenic orthostatic hypotension

\*Percentages represent respondents agreeing with the statement in a survey of patients.

Caregiver data not available due to small sample size

1. Claassen DO, et al. *BMC Neurol.* 2018;18(1):125

## How is nOH diagnosed and treated?<sup>1-4</sup>

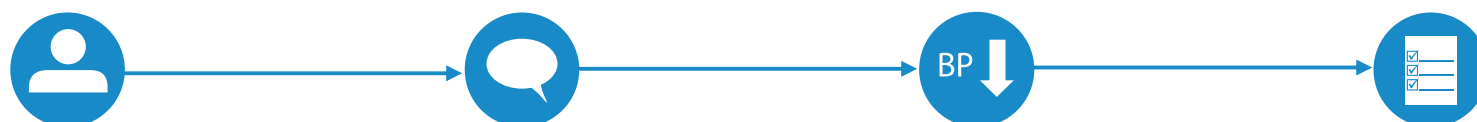

### Recognize Risk<sup>1</sup>

#### Certain medical conditions

- Parkinson disease
- Multiple system atrophy
- Pure autonomic failure
- Other neuropathies

#### Persons who

- Are older ( $\geq 70$  years)
- Are frail
- Take multiple medications
- Have unexplained falls or fainting

### Discuss Symptoms<sup>1</sup>

#### When standing, do you experience

- Falls?
- Dizziness?
- Confusion/“not thinking clearly”?
- Neck pain/aching?
- Blurry vision or other vision problems?
- Leg buckling/weakness?
- Other symptoms or “not feeling right”?

### Diagnose nOH

#### Measure BP and HR supine (lying down) and standing

- OH: SBP drop  $\geq 20$  mmHg (or DBP drop  $\geq 10$  mmHg) within 3 min of standing<sup>2</sup>
- nOH: small HR increase upon standing ( $< 15$  bpm)<sup>1</sup>

#### Look for neurogenic cause<sup>1</sup>

- Exclude other causes for BP decreases (eg, medications)
- Physical exam, patient history, or other testing if needed

### Manage Symptoms<sup>1</sup>

#### Lifestyle changes

- Increased fluid/salt intake
- Compression garments/abdominal binders
- Gentle recumbent exercise

#### Medications

- Droxidopa<sup>3\*</sup>
- Midodrine<sup>4†</sup>

#### Patient BP/symptom diary

- Use to track nOH symptoms and treatment response

BP=blood pressure; DBP=diastolic blood pressure; HR=heart rate; nOH=neurogenic orthostatic hypotension; OH=orthostatic hypotension; SBP=systolic blood pressure

\*Approved to treat the symptoms of nOH due to autonomic dysfunction

†Approved to treat symptomatic OH

1. Gibbons CH, et al. *J Neurol*. 2017;264(8):1567-1582; 2. Freeman R, et al. *Clin Auton Res*. 2011;21(2):69-72; 3. NORTHERA® (droxidopa). Full Prescribing Information, Lundbeck NA Ltd., Deerfield, IL, 2017; 4. ProAmatine® (midodrine hydrochloride tablets). Full Prescribing Information, Shire US Inc., Lexington, MA, 2017

## Key Points

- nOH commonly occurs in patients with disorders that affect the autonomic nervous system, such as Parkinson disease
- Patients with nOH
  - May have severe symptoms that can make doing daily activities difficult and decrease their quality of life
  - May not know that they have nOH
    - May think that their symptoms are due to the underlying neurologic condition
  - May not share their concerns about nOH symptoms with their healthcare providers
- Increased awareness about the recognition, diagnosis, and options for management of nOH symptoms can lead to improved patient outcomes

HCP=healthcare provider; nOH=neurogenic orthostatic hypotension

## Disclosures

- Jessie Sellers Gibson received support from Lundbeck for travel and registration fees and received research support and compensation for speaker bureau participation from Teva Neuroscience. Christine B. Hunter has served on advisory boards for Acorda Therapeutics and Lundbeck. L. Arthur Hewitt is an employee of Lundbeck.

## Acknowledgements

- The authors thank the patient and his caregiver (wife) for their participation in this project. Medical writing and editorial assistance was provided the CHC Group, LLC (North Wales, PA), an ICON plc company, which was supported by Lundbeck.
